# Supplementary material for: Caenorhabditis elegans nuclear RNAi factor SET-32 deposits the transgenerational histone modification, H3K23me3
Source: eLife. 2020 Aug 17;9:e54309. doi: 10.7554/eLife.54309 (PMC7431132; doi:10.7554/eLife.54309)
Supplement: Supplementary file 1. — A list of top set-32-dependent H3K23me3 genes taken from annotated list of 20911 C. elegans genes. In the second list, the top hrde-1-dependent H3K23me3 genes. The top genes were defined as those that were threefold higher in WT versus mutant in two libraries with a p-value of <0.05. [file elife-54309-supp1.xlsx]

## Sheet: Top set-32 genes
Gene Name 1	Gene Name 2	Chr	start	end	mRNA size	Germline Expression	GRH	GRTS
B0391.10	B0391.10	chrV	15585669	15592963	1072	Gender Neutral	yes	no
C06A5.4	C06A5.4	chrI	5980792	5981590	663	Gender Neutral	yes	no
C06A5.5	C06A5.5	chrI	5981817	5982454	414	Gender Neutral	yes	no
C18H2.2	C18H2.2	chrIII	7678947	7680785	1466	Gender Neutral	yes	no
C38D4.1a	C38D4.1	chrIII	4783156	4785213	1628	Gender Neutral	no	no
D2096.1	D2096.1	chrIV	8396644	8398419	477	Spermatogenic	yes	no
F10E7.2	F10E7.2	chrII	7122180	7124325	723	Gender Neutral	no	no
F37H8.2	F37H8.2	chrII	11171665	11175402	2085	Spermatogenic	yes	no
F55A3.7	F55A3.7	chrI	10785116	10787852	1476	Gender Neutral	yes	no
H04D03.3	H04D03.3	chrIII	10443035	10444832	1230	Gender Neutral	yes	no
K01G5.3	K01G5.3	chrIII	10750347	10751776	1172	Gender Neutral	no	no
K09B11.3	K09B11.3	chrIV	13430207	13430552	345	no	no	no
K09B11.4	K09B11.4	chrIV	13429507	13429936	429	no	yes	no
K10C8.1	K10C8.1	chrV	12692519	12695233	1701	Spermatogenic	yes	no
R11A8.1	R11A8.1	chrIV	10355094	10357134	1659	Spermatogenic	yes	no
T02G5.4	T02G5.4	chrII	7082040	7084328	1689	Spermatogenic	yes	no
W03G9.3	W03G9.3	chrI	4959397	4961520	1694	Gender Neutral	no	no
W03H9.3	W03H9.3	chrII	14142958	14143303	291	no	yes	no
Y18D10A.19.1	fkb-2	chrI	12918707	12919266	506	Gender Neutral	no	no
Y23H5A.1a	crs-2	chrI	2629693	2632250	917	no	yes	yes
Y37D8A.12a	Y37D8A.12	chrIII	12878394	12880579	1758	Gender Neutral	yes	no
Y43F4B.2	Y43F4B.2	chrIII	13293431	13296168	2084	no	yes	no
Y48G1BL.4	Y48G1BL.4	chrI	217147	217431	240	Gender Neutral	no	no
Y57A10A.3	Y57A10A.3	chrII	12150806	12151792	764	Gender Neutral	no	no
Y57G11C.51	Y57G11C.51	chrIV	14773559	14774526	724	Gender Neutral	no	no
Y76G2A.1	Y76G2A.1	chrI	5979501	5980138	414	Gender Neutral	yes	no

## Sheet: Top hrde-1 genes
Gene Name 1	Gene Name 2	Chr	start	end	mRNA size	Germline Expression	GRH	GRTS
W03H9.3	W03H9.3	chrII	14142958	14143303	291	no	yes	no
M01D7.7a	egl-30	chrI	1835679	1841192	1628	no	yes	no
C03B8.2	C03B8.2	chrIII	7716093	7716374	180	no	no	no
Y61A9LA.12	Y61A9LA.12	chrV	4553857	4554484	582	Gender Neutral	yes	no
K06B9.4	K06B9.4	chrIV	4191532	4192924	1296	Gender Neutral	yes	no
D2096.1	D2096.1	chrIV	8396644	8398419	477	Spermatogenic	yes	no
C06A5.4	C06A5.4	chrI	5980792	5981590	663	Gender Neutral	yes	no
C06A5.5	C06A5.5	chrI	5981817	5982454	414	Gender Neutral	yes	no
M116.2	M116.2	chrIV	8398844	8399775	832	Gender Neutral	yes	no
B0391.10	B0391.10	chrV	15585669	15592963	1072	Gender Neutral	yes	no
C41D11.6	C41D11.6	chrI	4460146	4462705	2559	Gender Neutral	yes	yes
F37H8.2	F37H8.2	chrII	11171665	11175402	2085	Spermatogenic	yes	no
T01E8.5	T01E8.5	chrII	10242522	10247559	4048	Gender Neutral	no	no
F16B4.6	F16B4.6	chrV	1587206	1589152	741	no	no	yes
Y18D10A.19.1	fkb-2	chrI	12918707	12919266	506	Gender Neutral	no	no
Y76G2A.1	Y76G2A.1	chrI	5979501	5980138	414	Gender Neutral	yes	no
W09H1.4	W09H1.4	chrII	13185003	13185505	405	Spermatogenic	yes	no
W09H1.3	W09H1.3	chrII	13184341	13184911	318	Gender Neutral	yes	no
F10E7.2	F10E7.2	chrII	7122180	7124325	723	Gender Neutral	no	no
F26E4.9.1	cco-1	chrI	9788769	9789912	644	Gender Neutral	no	no
B0391.9	fbxa-139	chrV	15593435	15593773	288	no	yes	no
Y110A7A.21	Y110A7A.21	chrI	5110077	5111157	592	no	no	no
K09B11.4	K09B11.4	chrIV	13429507	13429936	429	no	yes	no
T23G5.6	T23G5.6	chrIII	9240276	9242404	1271	Spermatogenic	no	no
C16A11.6	C16A11.6	chrII	4236538	4237743	942	Gender Neutral	no	no
Y23H5A.1a	crs-2	chrI	2629693	2632250	917	no	yes	yes
Y43F4B.2	Y43F4B.2	chrIII	13293431	13296168	2084	no	yes	no
Y73F8A.31	Y73F8A.31	chrIV	15513746	15514425	522	Gender Neutral	yes	no
Y56A3A.18	Y56A3A.18	chrIII	11917715	11918602	506	Gender Neutral	no	no
F09E5.9	F09E5.9	chrII	5346579	5347387	647	Gender Neutral	no	no
D2030.5	mce-1	chrI	7582100	7583344	827	Gender Neutral	no	no
Y57A10A.3	Y57A10A.3	chrII	12150806	12151792	764	Gender Neutral	no	no
T16G12.3	T16G12.3	chrIII	10051960	10052969	582	Gender Neutral	no	no
R17.1	fbxb-85	chrIII	10847626	10848549	861	no	no	no
K10C8.1	K10C8.1	chrV	12692519	12695233	1701	Spermatogenic	yes	no
K10C8.2	K10C8.2	chrV	12690491	12692343	1302	no	yes	no
C04G6.6	C04G6.6	chrII	5099420	5099732	312	Spermatogenic	no	no
F15D4.4	F15D4.4	chrII	13239153	13243023	1896	no	no	no
F37D6.3	F37D6.3	chrI	10486704	10487313	510	no	no	yes
Y69A2AL.2	Y69A2AL.2	chrIV	2482254	2484110	474	Gender Neutral	no	no
W05F2.5	fbxa-203	chrI	3371769	3373833	984	Gender Neutral	yes	no
Y48G1BM.8	Y48G1BM.8	chrI	248623	251580	963	Spermatogenic	yes	no
D2030.12	D2030.12	chrI	7583998	7585293	513	no	no	no
R11A8.1	R11A8.1	chrIV	10355094	10357134	1659	Spermatogenic	yes	no
F55A3.7	F55A3.7	chrI	10785116	10787852	1476	Gender Neutral	yes	no
F55A3.6	F55A3.6	chrI	10783988	10784780	357	Gender Neutral	yes	no
Y57G11C.51	Y57G11C.51	chrIV	14773559	14774526	724	Gender Neutral	no	no
K01A11.5	K01A11.5	chrIII	3448550	3451084	1881	no	no	no
C18H2.2	C18H2.2	chrIII	7678947	7680785	1466	Gender Neutral	yes	no
Y23H5A.8	Y23H5A.8	chrI	2633007	2634560	642	Gender Neutral	yes	yes
F09E5.10	F09E5.10	chrII	5348068	5350519	1758	Gender Neutral	no	no
M28.5.1	M28.5	chrII	10657937	10658550	533	Gender Neutral	no	no
F55A3.5	F55A3.5	chrI	10781962	10782879	579	Gender Neutral	yes	yes
Y20F4.8	Y20F4.8	chrI	2049141	2050179	1038	no	yes	no
W08F4.9	fbxb-14	chrII	582108	582747	639	no	no	no
K08F11.1	K08F11.1	chrIV	4724852	4725304	405	Spermatogenic	no	no
C09G9.6.1	oma-1	chrIV	8888954	8890982	1805	Oogenic	no	no
R06C1.4	R06C1.4	chrI	11930714	11931749	461	Spermatogenic	yes	no
K10C8.4	K10C8.4	chrV	12696054	12696856	565	no	no	no
F40G12.7	F40G12.7	chrV	14275646	14276321	579	no	yes	no
Y18D10A.25	fkb-8	chrI	12916429	12918052	1036	Spermatogenic	no	no
