# Supplementary material for: Caenorhabditis elegans nuclear RNAi factor SET-32 deposits the transgenerational histone modification, H3K23me3
Source: eLife. 2020 Aug 17;9:e54309. doi: 10.7554/eLife.54309 (PMC7431132; doi:10.7554/eLife.54309)
Supplement: Supplementary file 2. — ChIP-seq libraries are listed by experiment. [file elife-54309-supp2.xlsx]

## Sheet: libraries by experiment
Experiment	repeats	library name	sequencing depth (reads/million)
oma-1 RNAi feeding, 19°C, young adult stage
H3K23me1 ChIP-seq, WT	1	SG0918_lib37	8.5
H3K23me2 ChIP-seq, WT	1	SG0918_lib40	5.2
H3K23me3 ChIP-seq, WT	1	SG1218_lib1	5.5
H3K23me3 ChIP-seq, WT	2	SG0918_lib43	5.5
H3K23me3 ChIP-seq, set-32	1	SG1218_lib3	4.4839
H3K23me3 ChIP-seq, set-32	2	SG0219_lib21	0.930123
H3K23me3 ChIP-seq, met-2;set-25	1	SG1218_lib4	5.07758
H3K23me3 ChIP-seq, met-2;set-25	2	SG0219_lib22	2.83923
H3K23me3 ChIP-seq, hrde-1	1	SG1218_lib2	2.83489
H3K9me3 ChIP-seq, WT	1	SG0315_lib43	4.3
H3K9me3 ChIP-seq, set-32	1	SG0615_lib32	3.33832
H3K9me3 ChIP-seq, met-2;set-25	1	SG0315_lib44	4.24549
H3K9me3 ChIP-seq, hrde-1	1	SG0315_lib45	3.53272
GFP RNAi feeding, 19°C, young adult stage
H3K23me1 ChIP-seq, WT	1	SG0918_lib38	9.3
H3K23me2 ChIP-seq, WT	1	SG0918_lib41	9.6
H3K23me3 ChIP-seq, WT	1	SG0918_lib44	8.7
H3K9me3 ChIP-seq, WT	1	SG0315_lib40	5.6
smg-1 RNAi feeding, 19°C, young adult stage
H3K23me3 ChIP-seq, WT	1	SG0219_lib12	10.9976
H3K9me3 ChIP-seq, WT	1	SG0219_lib24	4.86151
oma-1 heritable, 19°C, multigenerational
oma-1 feeding, F0, H3K23me3 ChIP, WT	1	SG0219_lib1	3.0526
OP50 feeding, F1 H3K23me3 ChIP, WT	1	SG0219_lib2	1.98271
OP50 feeding, F2 H3K23me3 ChIP, WT	1	SG0219_lib3	3.42257
OP50 feeding, F3 H3K23me3 ChIP, WT	1	SG0219_lib4	4.24598
OP50 feeding, F4 H3K23me3 ChIP, WT	1	SG0219_lib5	4.62354
oma-1 feeding, F0, H3K9me3 ChIP, WT	1	SG1218_lib23	6.30308
OP50 feeding, F1 H3K9me3 ChIP, WT	1	SG1218_lib24	8.80636
OP50 feeding, F2 H3K9me3 ChIP, WT	1	SG1218_lib25	9.53542
OP50 feeding, F3 H3K9me3 ChIP, WT	1	SG1218_lib26	9.46389
OP50 feeding, F4 H3K9me3 ChIP, WT	1	SG0219_lib6	2.08127
OP50 feeding, 19°C, young adult stage
H3K23me1 ChIP-seq, WT		SG0918_lib36	8.4
H3K23me2 ChIP-seq, WT		SG0918_lib39	5.8
H3K23me3 ChIP-seq, WT		SG0918_lib42	6.1
ChIP-seq Input, WT		SG0918_lib45	8.6
