# Supplementary material for: Caenorhabditis elegans nuclear RNAi factor SET-32 deposits the transgenerational histone modification, H3K23me3
Source: eLife. 2020 Aug 17;9:e54309. doi: 10.7554/eLife.54309 (PMC7431132; doi:10.7554/eLife.54309)
Supplement: Supplementary file 3. [file elife-54309-supp3.xlsx]

## Sheet: Sheet1
plasmids for dsRNA feeding
gene	plasmid	sequence	description
oma-1	pSG42	gtCtctcaacgccatgcattggctgacattcgCgatcaaatggagcagcacatcatgactaaCggtcgcattgcagctcccccgctttctgcGattcagcatcctttagaaatgtttgccagAccatcaactccagatgagccagcggctaaGttgccactaggaccaactcctgttagtacCcgtggtccaagatatgagctaccaacgaaAgaattgcatgacgcggaaggtgcgatgacTtatccaccgtctcgctggccattggatccGtcgatgtttgctctagacgcttggaatatggcCcatcggccagctagtccactcgattcAatggttttgggttccgctccaaatgctggTtcgttcggaatgctcggaaagcaaaatacCcctgga…	oma-1 dsRNA trigger; chrIV:8,889,833-8,890,353; exclude intron; 478 bp; capital letters are mismatch every ~30nt; vector backbone L4440
GFP	pSG221		Andrew Fire created: L4417 backbone, GFP dsRNA feeding vector
smg-1	pSG27		L4440 backbone, chrI:6,907,655-6,909,158 (ce6), 1504 insert, cover smg-1 1kb coding region, for dsRNA feeding
oligos & plasmids for generating histone H3 mutants & genotyping
oligo(s)	plasmid	sequence	target
SG-1808		CATGGCTCGCACTCTGCAAACTGCTCGCAAGTCCACCGGCGGCAAAGCGCCGCGCAAGCAGCTGG	H3K4L mutant generation
SG-1809		CCAGCTGCTTGCGCGGCGCTTTGCCGCCGGTGGACTTGCGAGCAGTTTGCAGAGTGCGAGC	H3K4L mutant generation
SG-1806		CTCGCACTAAGCAAACTGCTCGCctgTCCACCGGCGGCAAAGCGCCGCGCAAGCAGCTGGCCACCAAGGCGGCTCGCAAGAGCGCTCCGGCC	H3K9L mutant generation
SG-1810		CATGGCTCGCACTAAGCAAACTGCTCGCAAGTCCACCGGCGGCACTGCGCCGCGCAAGCAGCTGG	H3K14L mutant generation
SG-1811		CCAGCTGCTTGCGCGGCGCAGTGCCGCCGGTGGACTTGCGAGCAGTTTGCTTAGTGCGAGC	H3K14L mutant generation
SG-1812		CATGGCTCGCACTAAGCAAACTGCTCGCAAGTCCACCGGCGGCAAAGCGCCGCGCCTGCAGCTGG	H3K18L mutant generation
SG-1813		CCAGCTGCAGGCGCGGCGCTTTGCCGCCGGTGGACTTGCGAGCAGTTTGCTTAGTGCGAGC	H3K18L mutant generation
SG-1814		CCACCCTGGCGGCTCGCAAGAGCGCTCCGGCCA	H3K23L mutant generation
SG-1815		CCGGTGGCCGGAGCGCTCTTGCGAGCCGCCAGGGTGG	H3K23L mutant generation
SG-1816		CCACCAAGGCGGCTCGCCTGAGCGCTCCGGCCA	H3K27L mutant generation
SG-1817		CCGGTGGCCGGAGCGCTCAGGCGAGCCGCCTTGGTGG	H3K27L mutant generation
SG-1818		CCGGTGGCGTCCTGAAGCCCCACCGCTACCGCCCCGGCACCGTGGCCCTGCGCGAGATCCGCCGCTACCAGAAG	H3K36L mutant generation
SG-1819		TCGACTTCTGGTAGCGGCGGATCTCGCGCAGGGCCACGGTGCCGGGGCGGTAGCGGTGGGGCTTCAGGACGCCA	H3K36L mutant generation
SG-1820		CCGGTGGCGTCAAGCTGCCCCACCGCTACCGCCCCGGCACCGTGGCCCTGCGCGAGATCCGCCGCTACCAGAAG	H3K37L mutant generation
SG-1821		TCGACTTCTGGTAGCGGCGGATCTCGCGCAGGGCCACGGTGCCGGGGCGGTAGCGGTGGGGCAGCTTGACGCCA	H3K37L mutant generation
	pSG371		H3K4L mutant generation
	pSG367		H3K9L mutant generation
	pSG372		H3K14L mutant generation
	pSG373		H3K18L mutant generation
	pSG374		H3K23L mutant generation
	pSG375		H3K27L mutant generation
	pSG376		H3K36L mutant generation
	pSG377		H3K37L mutant generation
	pSG395		his-12
	pSG396		his-11
	pSG397		his-9
	pSG398		his-31
SG-1886		tctggacgtggaaagggag	C. elegans H2A fragment amplification
SG-1887		gagtgcggccgcctta ctattccttatctccaccggtc	C. elegans H2A fragment amplification
SG-1888		CCACCAAAGCCATCTGCC	C. elegans H2B fragment amplification
SG-1889		gagtgcggccgcctta TTACTTGCTGGAAGTGTACTTGG	C. elegans H2B fragment amplification
SG-1890		gatataccATGGCTCGTACTAAGCAAACC	C. elegans H3.1 fragment amplification
SG-1891		gagtgcggccgcctta TTAAGCACGCTCTCCTCG	C. elegans H3.1 fragment amplification
SG-1892		TCCGGACGTGGAAAGGG	C. elegans H4 fragment amplification
SG-1893		gagtgcggccgcctta TTATCCTCCGAATCCGTACAAAG	C. elegans H4 fragment amplification
	pet28a_human_H3.1		a gift from Joe Landry, Addgene plasmid # 42631, was used to construct the mutant H3 expression plasmids used in this study
oligos & plasmids for GST fusion proteins
oligo(s)	plasmid	sequence	target
	pSG361		pGEX-6P-1-GST-SET-32-WT
	pSG355		pGEX-6P-1-GST-SET-25-WT
SG-1774		cctgggatccccggaattcATGTCATCGAAATCGAAGTCAC	set-32 cDNA fragment amplification by RT-PCR
SG-1775		cagtcacgatgcggccgctcgagTTAATCTAAAACAACTACATCGTCGT	set-32 cDNA fragment amplification by RT-PCR
SG-1764		ttccaggggcccctgggatccccggaattcATGAGCTCAAAATCTAAGTCTCGTACAAAAAAAAAGTTAAGACAACACTCGTCTCGCGGTCCTATTACTGAAATGTTAGCCTCTAATATGTGCATATTCGAAGCACCCCCCTTTAAGGCAGAGCAGGATTTTCCGATCTACCTGGCTGCCGGGTATGAGGAGCGCCGGACATTTTTGAAGGAGAGCGCTTGCTTAGTCGAGACCAAGCCCGACGTCGAAAATTATTCGCAGTCACATGTAAAGGTGTTAAACAAGATACGTAATGATCCTCACTTGAATGGTAACTGGAAATTACTTCCTAAGTATGATGAGGATGTGAAGGGCACCATGATGAGAATCCTGGGTCAGCGGGCTATGATAAGTCAAGGT…	codon optimized set-25 cDNA fragment
	pSG434		pGEX-6P-1-GST-SET-32-Y448F plasmid
SG-1951		CGAATTTAGAAATCGTTCGTGTCTACCAGAAAGGTCTTTCACCAGCTCACGTACATCTCGTTTTCATTTCGCTGTTAAACATTTATCCAGGAACACCGCTTACAATGGACTTTGGATACAACTACATGAAAAATCATCTCAATGGAAAATGCGAGTGCGGAAGTTTTGCATGTTTGAACAGAAAAAGCTCCTGTCATACAAATATGTCATTCGGAGATTTCGCAGCTTATTATCGCAAATTGGACCATCAACAGTGGGAAAGTTGGCACAAGAACATCTGCGAACCTCTTTCATGCAACGACGATGTAGTTGTTTTAGATTAActcgagcggccgcatcgtg	AccI-NotI fragment of the pGEX-6P-1-GST-SET-32-WT was replaced with a gBlock DNA from IDT (SG-1951) carrying the Y448F mutation
